# Supplementary material for: Copy Number Variants in the Kallikrein Gene Cluster
Source: PLoS One. 2013 Jul 22;8(7):e69097. doi: 10.1371/journal.pone.0069097 (PMC3718828; doi:10.1371/journal.pone.0069097)
Supplement: Table S3 — The assay information is from the Applied Biosystems homepage (http://www.appliedbiosystems.com/absite/us/en/home.html). (A) Assays used in the first screening for CNVs. We used one assay per gene. (B) Assays used to confirm the findings from the SNP study and the first part of the CNV study. (XLS) [file pone.0069097.s005.xls]

## Sheet: Supplementary Table 3
Table S3. Copy number assays in the kallikrein gene locus analyzed in this study. The assay information
is from the Applied Biosystems homepage (http://www.appliedbiosystems.com/absite/us/en/home.html).
(A) Assays used in the first screening for CNVs. We used one assay per gene. (B) Assays used to confirm
the findings from the SNP study and the first part of the CNV study.
A
Gene	Gene locationa	Assay ID	Assay locationa	Assay gene location
KLK1	56014216-56018855	Hs01017838	56016788	Overlaps Intron 2 - Exon 2
KLK15	56020357-56026591	Hs01790550	56022812	Within Exon 2
KLK3	56049983-56055832	Hs01732300	56055411	Within Exon 5
KLK2	56068501-56075635	Hs03074223	56072193	Within Intron 4
KLK4	56101420-56105806	Hs02163753	56103730	Within Exon 3
KLK5	56138371-56148088	Hs01032879	56143969	Within Exon 4
KLK6	56153699-56164741	Hs02687726	56158543	Within Exon 5
KLK7	56171541-56178962	Hs02987582	56175372	Within Exon 5
KLK8	56191076-56196770	Hs07156533	56192327	Within Intron 5
KLK9	56197581-56204702	Hs01692908	56201686	Within Exon 3
KLK10	56209338-56215094	Hs02306802	56212259	Within Exon 5
KLK11	56217299-56223102	Hs00954571	56220675	Overlaps Intron 3 - Intron 4
KLK12	56224160-56229960	Hs00242903	56227005	Within Exon 4
KLK13	56251275-56260179	Hs01501188	56255599	Within Exon 2
KLK14	56272966-56279314	Hs07156030	56276345	Within Intron 4
aNCBI Build 36.3, chromosome 19.
B
Gene	Gene locationa	Assay ID	Assay locationa	Assay gene location
KLK15	56020357-56026591	Hs01663685	56020729	Within Exon 5
KLK15	56020357-56026591	Hs07142026	56024507	Within Intron 1
KLK15	56020357-56026591	Hs01333414	56026533	Overlaps Intron 1 - Exon 1
KLK3	56049983-56055832	Hs07147500	56050727	Within Intron 1
KLK3	56049983-56055832	Hs00382497	56054883	Within Exon 5
		Hs07151236	56066724
KLK8	56191076-56196770	Hs00881540	56195730	Within Exon 3
KLK9	56197581-56204702	Hs07126574	56199875	Within Intron 3
KLK9	56197581-56204702	Hs07123865	56202306	Within Intron 2
aNCBI Build 36.3, chromosome 19.
